# Supplementary material for: Asymmetry costs: Effects of wing damage on hovering flight performance in the hawkmothManduca sexta
Source: Oxford University Press journal article supplement (doi:10.1242/jeb.153494), 2017-01-01
Supplement: jeb153494supp.pdf [file jeb153494supp.pdf]

## Supplementary Data

Table S1. Morphological parameters for each individual during control (full wings) and clipped wing treatments. Moths 1- 8 were used for the load-lifting experiment and moths 9 – 15 were used for the respirometry experiment. Asymmetric trials were recorded from moths 1, 2, 10, 11, 12, 13, 14 after clipping the right wing (R) and in moths 3, 4, 5, 6, 7, 8, 9 after clipping the left wing (L).

| Moth | Treatment | Wing area (cm <sup>2</sup> ) |       | Length (cm) |      | 2 <sup>nd</sup> moment (cm <sup>4</sup> ) |       | 3 <sup>rd</sup> moment (cm <sup>5</sup> ) |        | Total Clip (%) |       |
|------|-----------|------------------------------|-------|-------------|------|-------------------------------------------|-------|-------------------------------------------|--------|----------------|-------|
|      |           | L                            | R     | L           | R    | L                                         | R     | L                                         | R      | L              | R     |
| 1    | Control   | 7.42                         | 7.53  | 5.34        | 5.31 | 73.53                                     | 76.94 | 280.24                                    | 295.38 | 10.17          | 9.35  |
|      | Clipped   | 6.67                         | 6.83  | 4.52        | 4.54 | 54.78                                     | 59.58 | 188.12                                    | 210.07 |                |       |
| 2    | Control   | 7.28                         | 7.14  | 5.13        | 5.19 | 64.66                                     | 65.57 | 233.63                                    | 239.49 | 9.40           | 8.68  |
|      | Clipped   | 6.59                         | 6.52  | 4.41        | 4.38 | 50.42                                     | 50.39 | 167.44                                    | 167.80 |                |       |
| 3    | Control   | 6.86                         | 6.91  | 5.27        | 5.28 | 65.95                                     | 66.60 | 244.82                                    | 247.67 | 22.86          | 18.46 |
|      | Clipped   | 5.29                         | 5.63  | 3.80        | 4.00 | 33.42                                     | 39.70 | 99.33                                     | 124.85 |                |       |
| 4    | Control   | 6.53                         | 6.62  | 4.94        | 4.95 | 57.02                                     | 56.42 | 202.11                                    | 197.81 | 14.23          | 16.28 |
|      | Clipped   | 5.60                         | 5.54  | 4.07        | 3.90 | 39.25                                     | 36.65 | 123.12                                    | 111.87 |                |       |
| 5    | Control   | 6.03                         | 6.15  | 4.57        | 4.70 | 44.83                                     | 46.26 | 147.67                                    | 153.86 | 16.16          | 21.97 |
|      | Clipped   | 5.06                         | 4.80  | 3.71        | 3.49 | 28.26                                     | 25.04 | 79.89                                     | 68.20  |                |       |
| 6    | Control   | 6.67                         | 6.43  | 5.19        | 4.93 | 59.18                                     | 52.44 | 215.17                                    | 181.78 | 12.06          | 11.75 |
|      | Clipped   | 5.87                         | 5.67  | 4.24        | 4.18 | 42.34                                     | 38.46 | 136.68                                    | 120.54 |                |       |
| 7    | Control   | 7.27                         | 7.27  | 5.06        | 4.94 | 62.18                                     | 65.65 | 222.19                                    | 238.13 | 9.18           | 8.37  |
|      | Clipped   | 6.61                         | 6.67  | 4.60        | 4.46 | 51.13                                     | 53.91 | 171.19                                    | 183.72 |                |       |
| 8    | Control   | 7.29                         | 7.23  | 5.37        | 5.16 | 74.04                                     | 65.67 | 282.34                                    | 239.66 | 7.52           | 8.43  |
|      | Clipped   | 6.75                         | 6.62  | 4.77        | 4.42 | 61.44                                     | 52.69 | 220.01                                    | 177.74 |                |       |
| 9    | Control   | 8.92                         | 9.66  | 4.35        | 4.68 | 49.34                                     | 61.18 | 152.61                                    | 202.78 | 23.22          | 24.57 |
|      | Clipped   | 6.85                         | 7.28  | 3.46        | 3.78 | 21.94                                     | 33.50 | 51.22                                     | 92.51  |                |       |
| 10   | Control   | 9.41                         | 9.18  | 5.32        | 4.94 | 70.33                                     | 62.57 | 250.10                                    | 209.11 | 10.01          | 9.26  |
|      | Clipped   | 8.47                         | 8.32  | 4.24        | 3.92 | 48.16                                     | 45.81 | 147.89                                    | 137.48 |                |       |
| 11   | Control   | 11.01                        | 10.54 | 5.46        | 5.60 | 85.54                                     | 84.18 | 309.88                                    | 317.97 | 11.33          | 12.17 |
|      | Clipped   | 9.76                         | 9.25  | 4.10        | 4.10 | 53.22                                     | 49.06 | 159.82                                    | 147.56 |                |       |
| 12   | Control   | 10.62                        | 10.54 | 5.34        | 5.60 | 76.63                                     | 84.88 | 267.95                                    | 317.97 | 7.62           | 9.70  |
|      | Clipped   | 9.81                         | 9.52  | 4.41        | 4.39 | 57.57                                     | 56.10 | 180.66                                    | 178.43 |                |       |
| 13   | Control   | 9.63                         | 9.32  | 5.25        | 5.17 | 70.47                                     | 66.61 | 247.77                                    | 230.41 | 9.90           | 9.91  |
|      | Clipped   | 8.68                         | 8.40  | 4.15        | 4.13 | 49.78                                     | 47.27 | 152.72                                    | 142.26 |                |       |
| 14   | Control   | 9.13                         | 8.77  | 4.99        | 4.83 | 58.59                                     | 51.68 | 195.24                                    | 167.07 | 8.40           | 8.24  |
|      | Clipped   | 8.36                         | 8.05  | 4.13        | 3.89 | 46.81                                     | 38.17 | 140.53                                    | 109.89 |                |       |

Table S2. Maximum load and wing kinematics data

| Moth | Treatment  | Mass (g) | Max. Force (mN) | Flapping Frequency (Hz) | Flapping Amplitude R – (Deg.) | Flapping amplitude L – (Deg.) |
|------|------------|----------|-----------------|-------------------------|-------------------------------|-------------------------------|
| 1    | Control    | 1.76     | 29.11           | 28.74                   | 114.7                         | 117.6                         |
|      | Asymmetric | 1.69     | 24.53           | 28.07                   | 110.4                         | 110.7                         |
|      | Symmetric  | 1.45     | 24.16           | 29.01                   | 115.6                         | 113.2                         |
| 2    | Control    | 1.49     | 26.53           | 27.34                   | 122.0                         | 121.8                         |
|      | Asymmetric | 1.54     | 25.01           | 28.87                   | 123.7                         | 116.0                         |
|      | Symmetric  | 1.48     | 22.48           | 29.27                   | 117.5                         | 129.9                         |
| 3    | Control    | 1.46     | 26.05           | 31.05                   | 109.3                         | 106.9                         |
|      | Asymmetric | 1.38     | 17.48           | 32.27                   | 87.4                          | 134.0                         |
|      | Symmetric  | 1.35     | 16.22           | 30.32                   | 122.9                         | 131.8                         |
| 4    | Control    | 1.41     | 21.75           | 27.26                   | 115.9                         | 106.9                         |
|      | Asymmetric | 1.27     | 16.49           | 29.31                   | 108.0                         | 128.8                         |
|      | Symmetric  | 1.24     | 16.15           | 29.25                   | 119.8                         | 127.2                         |
| 5    | Control    | 1.44     | 22.00           | 29.49                   | 130.1                         | 117.0                         |
|      | Asymmetric | 1.21     | 15.82           | 29.52                   | 107.4                         | 124.0                         |
|      | Symmetric  | 1.24     | 14.07           | 29.97                   | 123.0                         | 119.9                         |
| 6    | Control    | 1.54     | 27.31           | 29.03                   | 120.5                         | 115.7                         |
|      | Asymmetric | 1.49     | 19.03           | 29.27                   | 106.8                         | 121.9                         |
|      | Symmetric  | 1.42     | 20.09           | 30.01                   | 120.6                         | 121.2                         |
| 7    | Control    | 1.57     | 24.23           | 28.55                   | 125.6                         | 113.8                         |
|      | Asymmetric | 1.86     | 26.20           | 28.38                   | 121.6                         | 121.5                         |
|      | Symmetric  | 1.66     | 24.27           | 30.06                   | 120.0                         | 125.2                         |
| 8    | Control    | 1.58     | 27.76           | 27.01                   | 125.5                         | 127.9                         |
|      | Asymmetric | 1.53     | 24.93           | -                       | -                             | -                             |
|      | Symmetric  | 1.50     | 25.10           | 28.10                   | 131.6                         | 126.9                         |

Table S3. Oxygen consumption and carbon dioxide production data

| Moth | Treatment  | Mass (g) | $\dot{V}O_2$ (ml hr <sup>-1</sup> ) | VCO <sub>2</sub> (ml hr <sup>-1</sup> ) |
|------|------------|----------|-------------------------------------|-----------------------------------------|
| 9    | Control    | 1.56     | 90.80                               | 77.07                                   |
|      | Asymmetric | 1.56     | 115.76                              | 102.03                                  |
|      | Symmetric  | 1.57     | 134.48                              | 103.70                                  |
| 10   | Control    | 1.67     | 88.04                               | 59.78                                   |
|      | Asymmetric | 1.63     | 112.14                              | 92.56                                   |
|      | Symmetric  | 1.63     | 108.12                              | 92.38                                   |
| 11   | Control    | 1.73     | 84.34                               | 68.8                                    |
|      | Asymmetric | 1.63     | 96.79                               | 82.84                                   |
|      | Symmetric  | 1.53     | 77.30                               | 64.12                                   |
| 12   | Control    | 1.89     | 83.56                               | 65.49                                   |
|      | Asymmetric | 1.63     | 109.65                              | 87.29                                   |
|      | Symmetric  | 1.62     | 78.15                               | 61.08                                   |
| 13   | Control    | 1.69     | 84.06                               | 75.57                                   |
|      | Asymmetric | 1.61     | 96.78                               | 99.26                                   |
|      | Symmetric  | 1.50     | 126.17                              | 111.23                                  |
| 14   | Control    | 1.29     | 72.32                               | 56.63                                   |
|      | Asymmetric | 1.23     | 89.64                               | 79.37                                   |
|      | Symmetric  | 1.12     | 80.25                               | 67.10                                   |
